# Supplementary material for: Arbuscular mycorrhizal fungi alter the food utilization, growth, development and reproduction of armyworm (Mythimna separata) fed on Bacillus thuringiensis maize
Source: PeerJ. 2019 Sep 12;7:e7679. doi: 10.7717/peerj.7679 (PMC6745183; doi:10.7717/peerj.7679)
Supplement: Data S1 [file peerj-07-7679-s001.xlsx]

## Sheet:  Colonization indexs-Fig.1
				Colonization-Seedling stage (%)	SE	Colonization-Heading stage (%)	SE	Colonization-Harvest (%)	SE
	2017	Bt	Glomus caledonium	36.2383	2.7684	62.25	3.99033	83.7233	2.52039
			CK	4.80667	1.42433	9.02667	1.24478	15.0133	1.91728
		Xy	Glomus caledonium	37.8467	3.44984	60.5633	3.40817	86.3333	2.06606
			CK	5.30333	1.30581	10.5733	1.93964	16.0733	2.07827
	2018	Bt	Glomus caledonium	22.785	1.88485	60.5083	3.50654	81.9267	2.21992
			CK	5.93167	0.793761	10.2383	1.64712	16.0767	1.53854
		Xy	Glomus caledonium	28.44	2.30328	57.105	2.43567	78.57	4.66888
			CK	5.34333	1.13306	10.8617	1.6129	14.32	1.27087

## Sheet: Food utilization indexs-Fig.2 
				RCR (mg/g/d)	SE	RGR (mg/g/d)	SE	AD (%)	SE	ECD (%)	SE	ECI (%)	SE
	2017	Bt	Glomus caledonium	526.112	12.9876	24.5663	1.15859	34.6228	1.07291	13.4945	0.668667	4.66792	0.117998
			CK	587.766	15.6326	32.4069	1.35553	38.0583	0.762355	14.4852	0.229033	5.51342	0.172366
		Xy	Glomus caledonium	708.476	11.788	68.6792	2.96881	48.8709	1.89227	19.8909	1.80433	9.69861	0.530184
			CK	639.635	20.5026	50.1786	1.88333	41.6861	1.11084	19.4127	0.950089	8.08537	0.185396
	2018	Bt	Glomus caledonium	508.405	13.876	24.9626	1.24696	25.0555	0.804037	19.6277	1.47293	4.91685	0.376923
			CK	541.298	10.6039	32.5625	2.13189	29.9741	1.08439	20.0842	1.38794	6.01247	0.286007
		Xy	Glomus caledonium	732.642	13.998	79.6013	4.65228	43.1044	1.48974	25.1927	0.405755	10.8597	0.435791
			CK	637.276	27.0624	50.8066	1.74268	36.1393	0.599013	23.776	1.3418	8.59031	0.443287

## Sheet: Development indexs-Fig.3
				Larval life-span (g)	SE	Pupation rate (%)	SE	Pupal weight (g)	SE	Eclosion rate (%)	SE	Adult longevity (g)	SE	Fecundity (eggs per female)	SE
	2017	Bt	Glomus caledonium	17.868	0.280303	58	3.79986	0.2073	0.00458508	54.666	3.80161	6.038	0.209452	134.2	10.895
			CK	16.608	0.22698	57.334	4.9429	0.2282	0.00318512	56	5.96192	7.078	0.257915	166.2	4.65833
		Xy	Glomus caledonium	13.574	0.2945	85.998	3.65331	0.2838	0.00376524	82	3.79986	9.914	0.260826	258.6	11.8025
			CK	15.484	0.169056	79.334	2.78608	0.2569	0.00445612	78	5.58022	7.954	0.170088	190.6	13.8311
	2018	Bt	Glomus caledonium	17.026	0.268011	60.666	6.41188	0.18628	0.00342447	53.332	4.19479	6.154	0.189024	138.2	7.94984
			CK	15.426	0.192172	61.334	6.16829	0.2168	0.0061225	54	4.71405	7.256	0.25501	172.6	8.87694
		Xy	Glomus caledonium	12.988	0.276893	88	3.79986	0.26066	0.00332385	83.334	3.19346	9.58	0.215407	242.4	9.58123
			CK	14.476	0.24956	78.668	2.97844	0.23286	0.00359764	71.665	1.92258	8.182	0.298111	212.4	11.2161

## Sheet: Yields indexs-Fig.4
						Grain weight per maize plant (g)	SE	1000-grain weight (g)	SE
			2017	Bt	Glomus caledonium	49.9018	1.67612	335.497	7.84092
					CK	35.7474	2.30391	308.73	8.8545
				Xy	Glomus caledonium	46.2306	3.91791	330.253	3.57101
					CK	34.7438	2.56531	304.39	5.49239
			2018	Bt	Glomus caledonium	36.3933	0.837636	321.363	4.59681
					CK	29.32	1.31343	299.327	5.75365
				Xy	Glomus caledonium	38.73	1.13212	341.357	4.925
					CK	29.66	1.52292	314.483	8.54062
